# Supplementary material for: GABA operates upstream of H+-ATPase and improves salinity tolerance in Arabidopsis by enabling cytosolic K+ retention and Na+ exclusion
Source: PubMed Central journal article supplement — J Exp Bot. 2019 Aug 17;70(21):6349–61. doi: 10.1093/jxb/erz367 (PMC6859739; doi:10.1093/jxb/erz367), 2019-08-17
Supplement: erz367_suppl_supplementary_information.pdf [file erz367_suppl_supplementary_information.pdf]

**GABA operates upstream of H<sup>+</sup>-ATPase and improves salinity tolerance in Arabidopsis by enabling cytosolic K<sup>+</sup> retention and Na<sup>+</sup> exclusion**

Nana Su<sup>1,3,#</sup>, Qi Wu<sup>2,3#</sup>, Jiahui Chen<sup>1</sup>, Lana Shabala<sup>3</sup>, Axel Mithöfer<sup>4</sup>, Haiyang Wang<sup>3</sup>,  
Mei Qu<sup>3</sup>, Min Yu<sup>2</sup>, Jin Cui<sup>1\*</sup>, Sergey Shabala<sup>2,3,\*</sup>

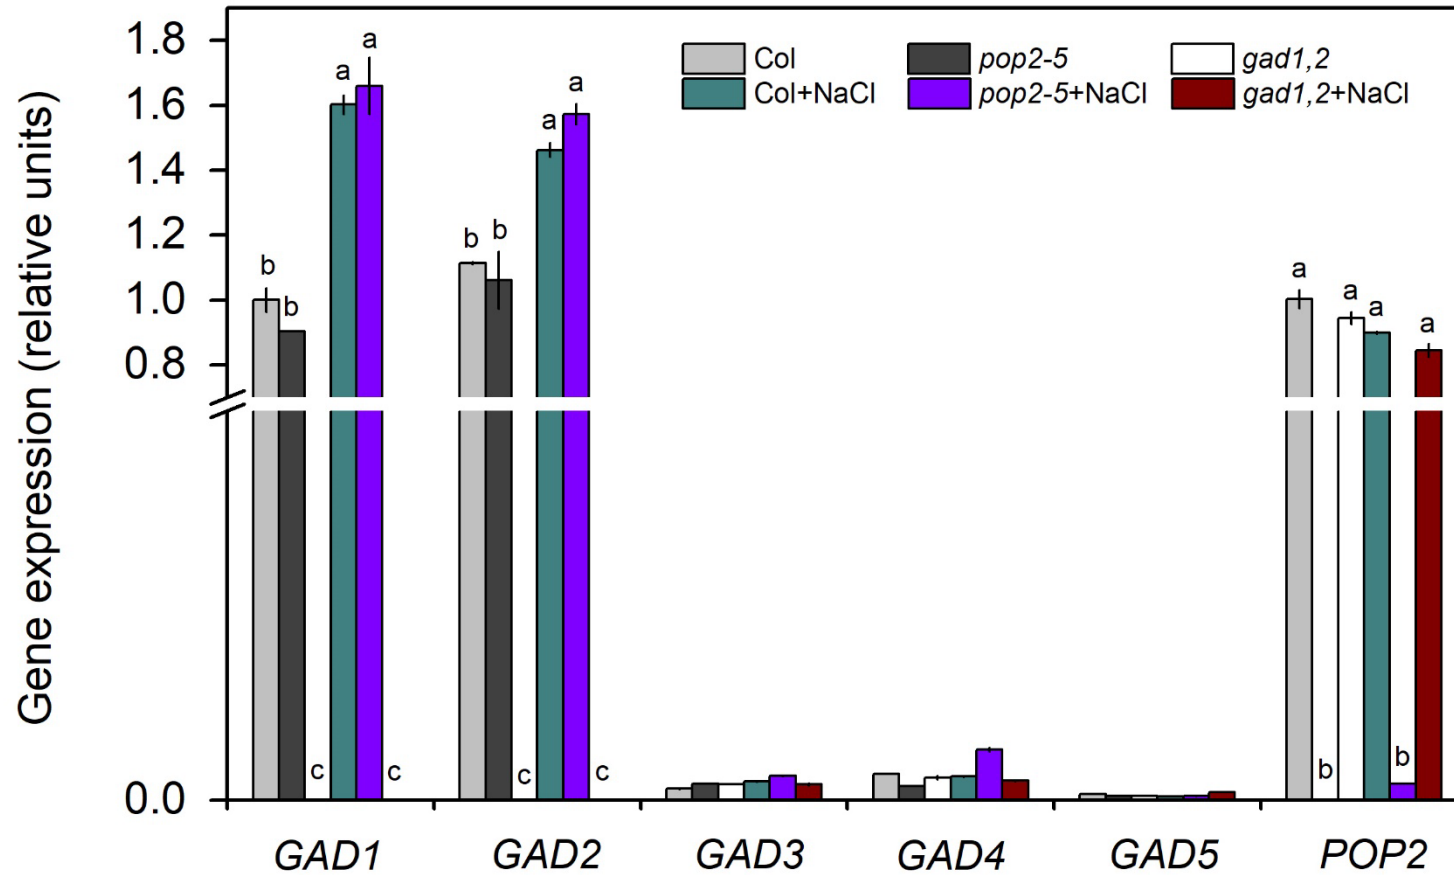

**Fig. S1** Relative gene expressions of *GAD1-GAD5* and *POP2* in the roots of 4-week old Col-0, *pop 2-5* and *gad 1,2* seedlings. Plants were first grown in Petri dishes for 1 week in  $\frac{1}{2}$ -strength MS medium with 2% w/v phytoigel and then transferred into  $\frac{1}{4}$  Hoagland nutrition solution for 3 weeks. Seedlings were then treated with 100 mM NaCl for 12 h under standard condition (day/night cycle, 16/8 hours; light intensity, 100-150  $\text{mmol m}^{-2} \text{s}^{-1}$ ; temperature day/night, 25/20°C). Data are mean values of three independent experiments, with each containing three replicates. Data labelled with different low case letters is significantly different at  $P < 0.05$  level.

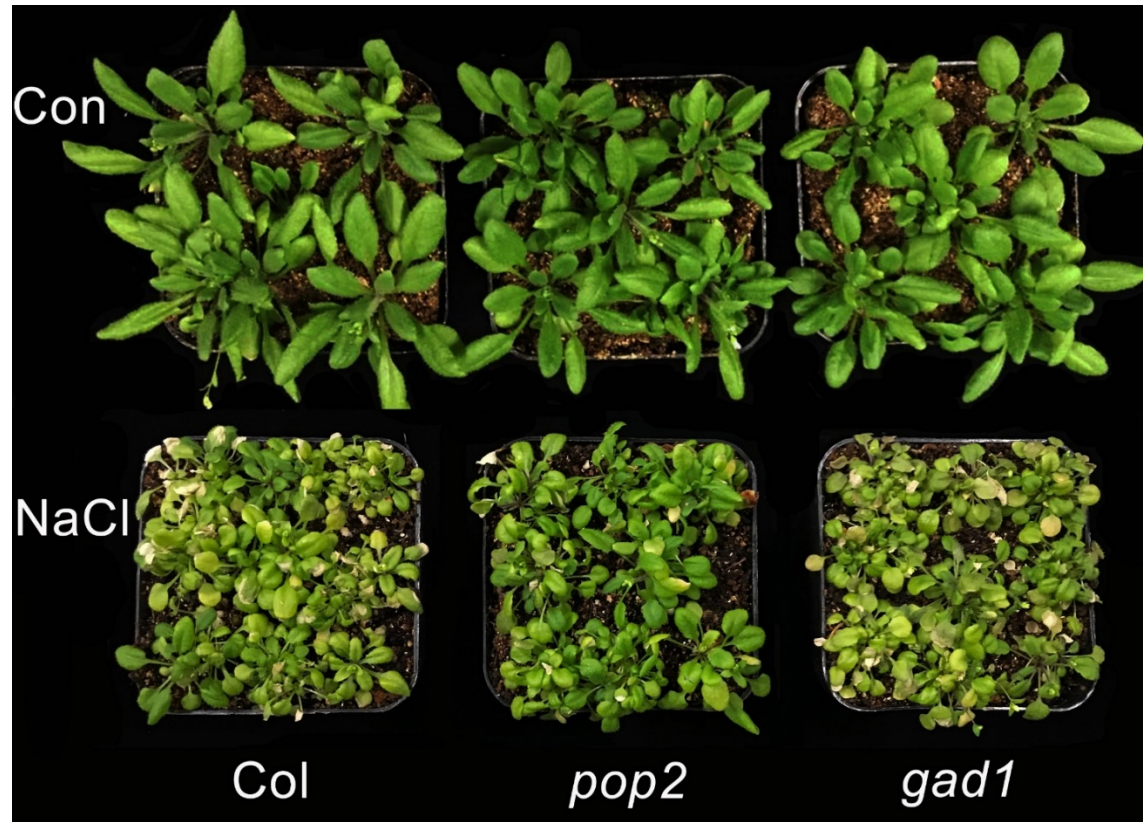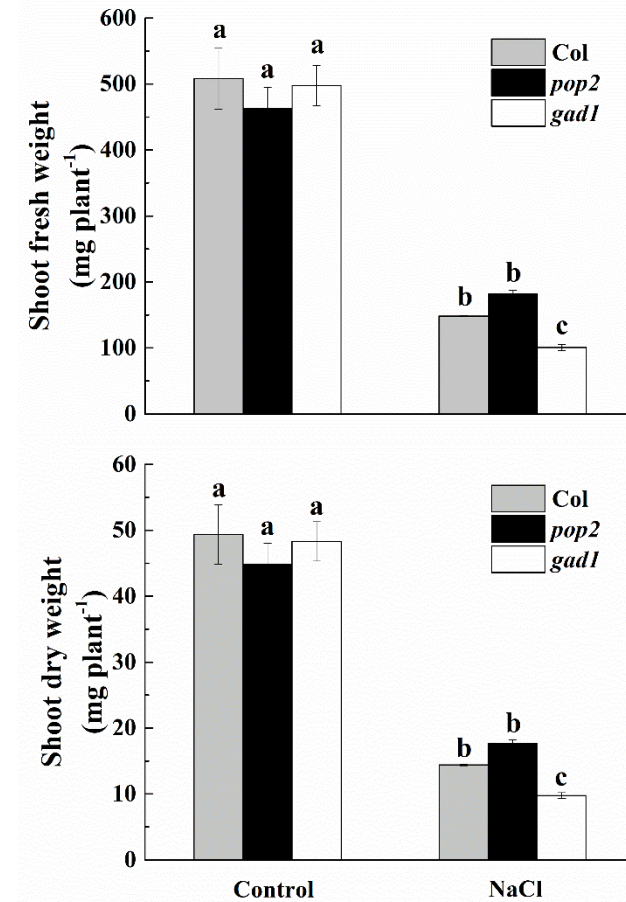

**Fig. S2** Phenotypes of *pop2*, *gad1* and Col Arabidopsis seedlings treated with and without 100 mM NaCl. Plants were first grown in Petri dishes for 1 week in ½ -strength MS medium with 2% w/v phytogel and then transferred into soil for 1 week. Seedlings were then treated with or without 100 mM NaCl for 2 weeks. Day/night cycle was 16/8 hours; light intensity was 100-150 mmol m<sup>-2</sup> s<sup>-1</sup>; temperature day/night was 25/20°C.

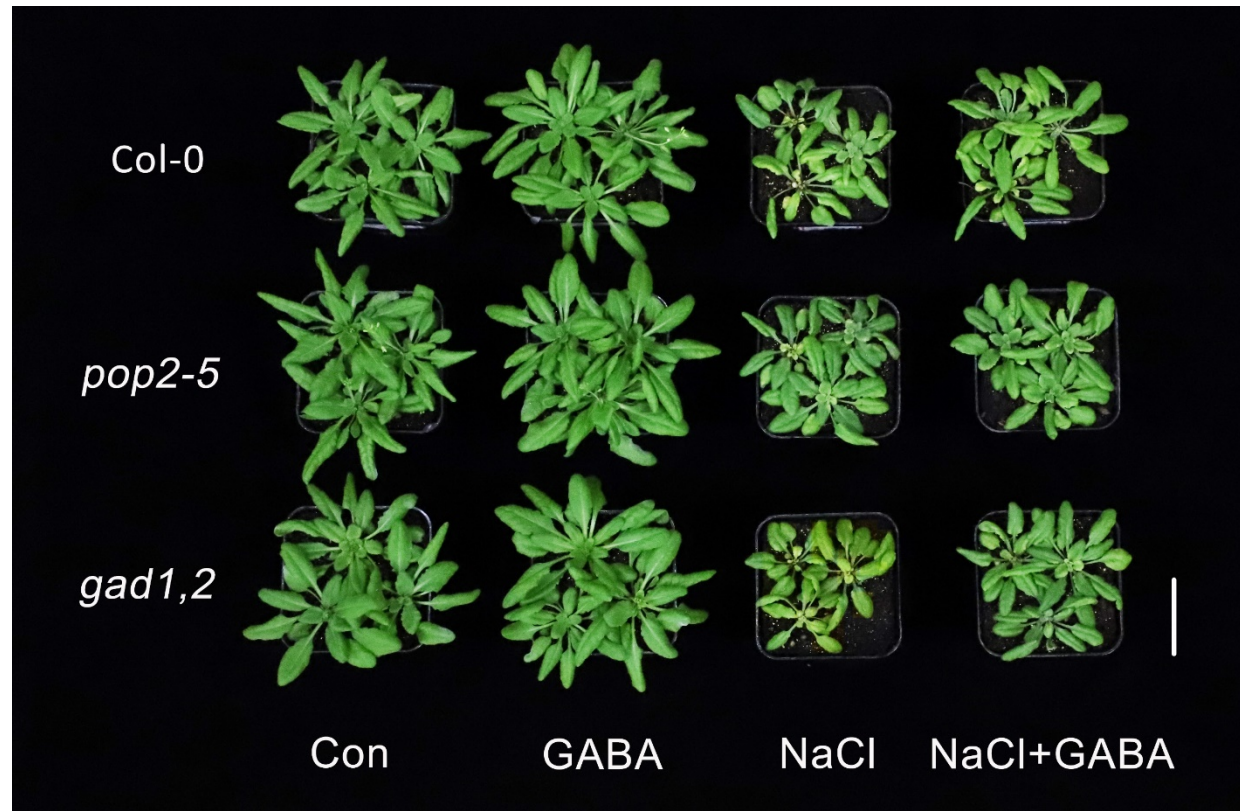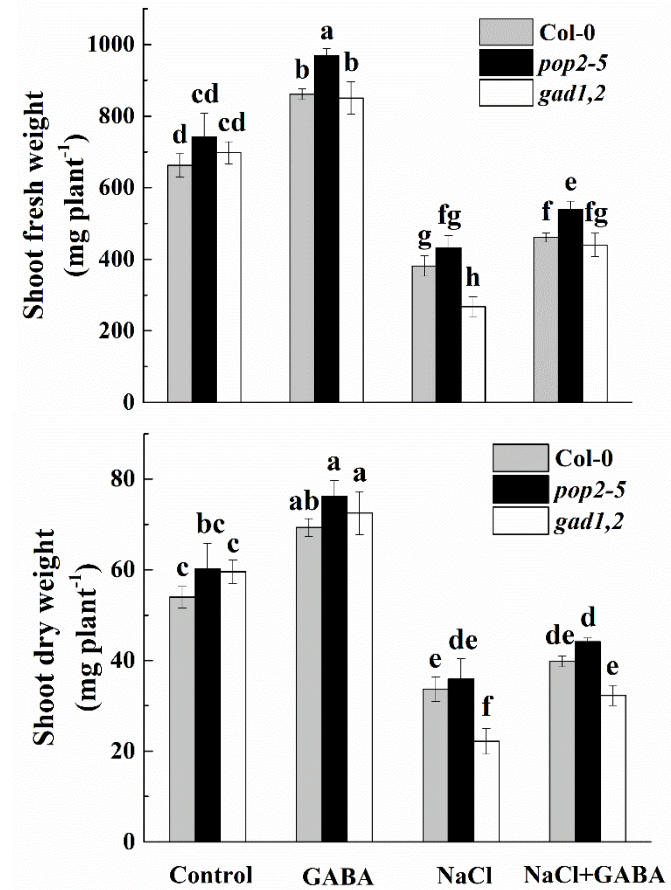

**Fig. S3** Exogenous ABA application rescues salt-sensitive *gad1,2* phenotype. Col, *pop2-5* and *gad1,2* Arabidopsis seedlings were grown in soil (turf : nutrient soil=1:1) for 4 week. Seedlings were then treated with 100 mM NaCl, 1 mM GABA or 100 mM NaCl + 1 mM GABA for 10 days. Day/night cycle was 14/10 hours; light intensity was 100-150  $\mu\text{mol m}^{-2} \text{s}^{-1}$ ; temperature day/night was 25/20°C. Bar=3 cm.

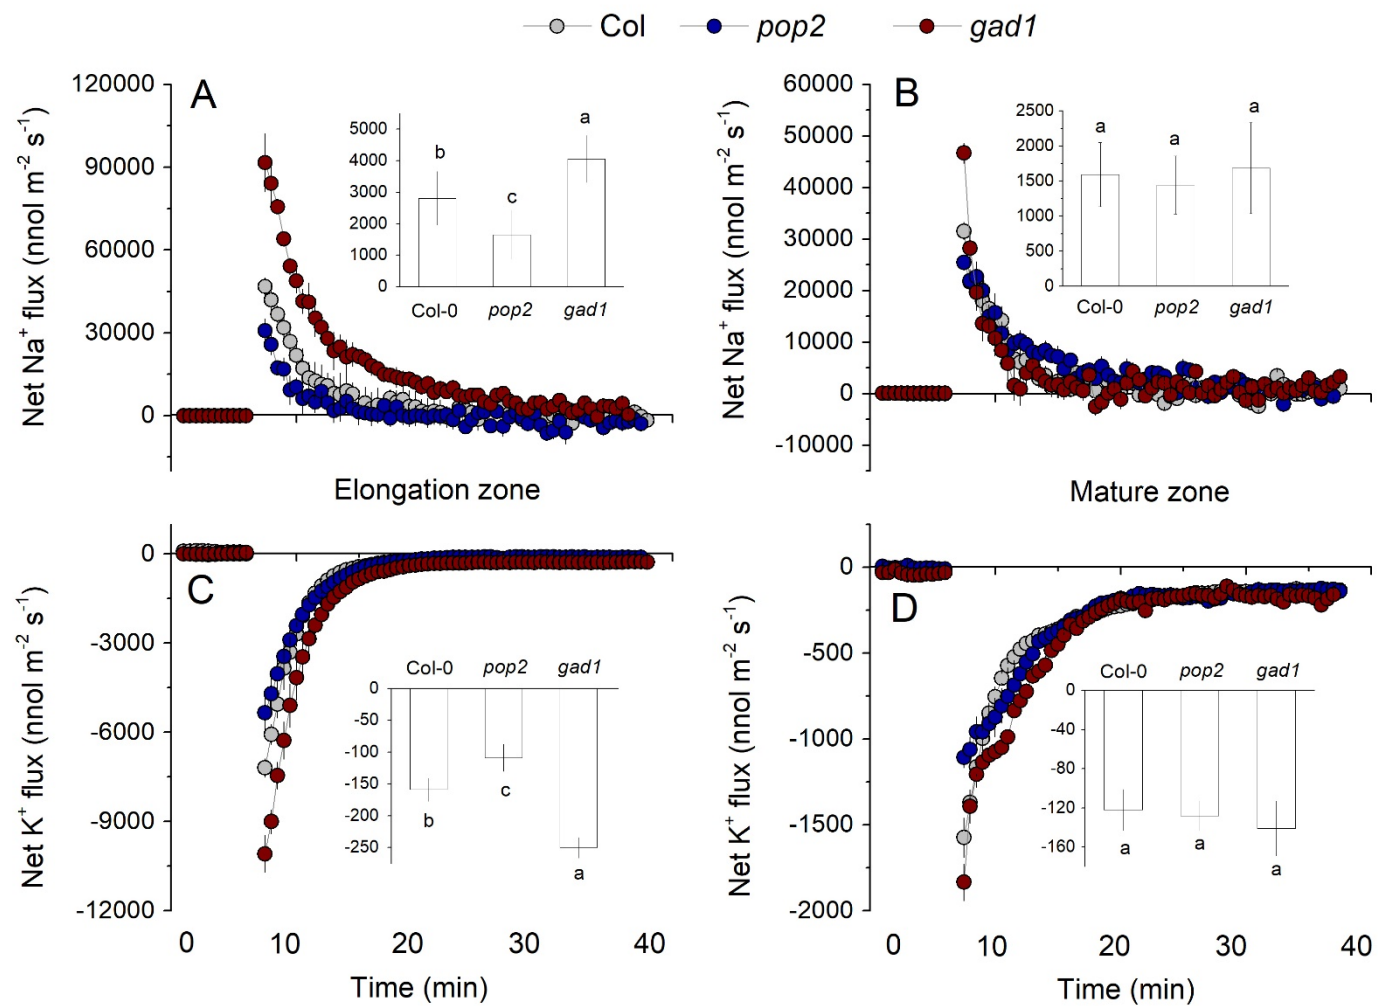

**Fig. S4** Transient Na<sup>+</sup>, K<sup>+</sup> and H<sup>+</sup> fluxes measured from the elongation zone (A-C) and mature (D-F) root zone of 4-d old Col-0, *pop 2* and *gad 1* seedlings in response to 100 mM NaCl treatment. The insets show steady fluxes after 30 min of salinity exposure. Data are mean  $\pm$  SE (n = 6). The sign convention is “efflux negative”. Data labelled with different low case letters is significantly different at  $P < 0.05$  level.

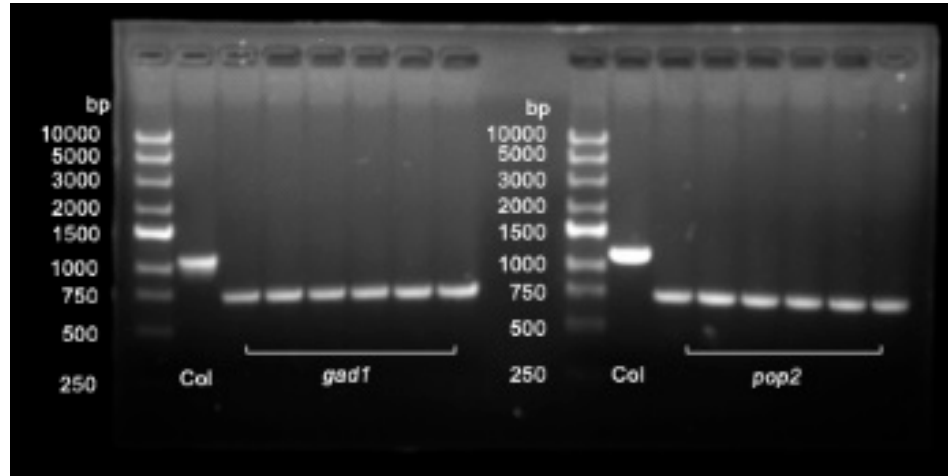

**Fig. S5** The homozygosis of *gad1* and *pop2*. The primers (LBb1.3+LP+RP) were designed by T-DNA Primer Design Tool ( <http://signal.salk.edu/tdnaprimers.2.html> ).
